# Supplementary material
Source: MDPI journal article supplement (https://www.mdpi.com/2079-6412/11/9/1024)
Supplement: s1 [file s1 › coatings-1333336-supplementary.pdf]

# Assembly and Transport Properties of Nanoscale Biopolyelectrolyte Multilayers

Jaebum Park <sup>1</sup> and Michael J. McShane <sup>1,2,\*</sup>

<sup>1</sup> Department of Materials Science and Engineering, Texas A&M University, College Station, TX 77843-3120, USA; jbpark@tamu.edu; Fax: +1 979 845 4450; Tel: +1 979 845 9363

<sup>2</sup> Department of Biomedical Engineering, Texas A&M University, College Station, TX 77843-3120, USA

\* Correspondence: mcshane@tamu.edu; Tel.: +1 979 845 7941

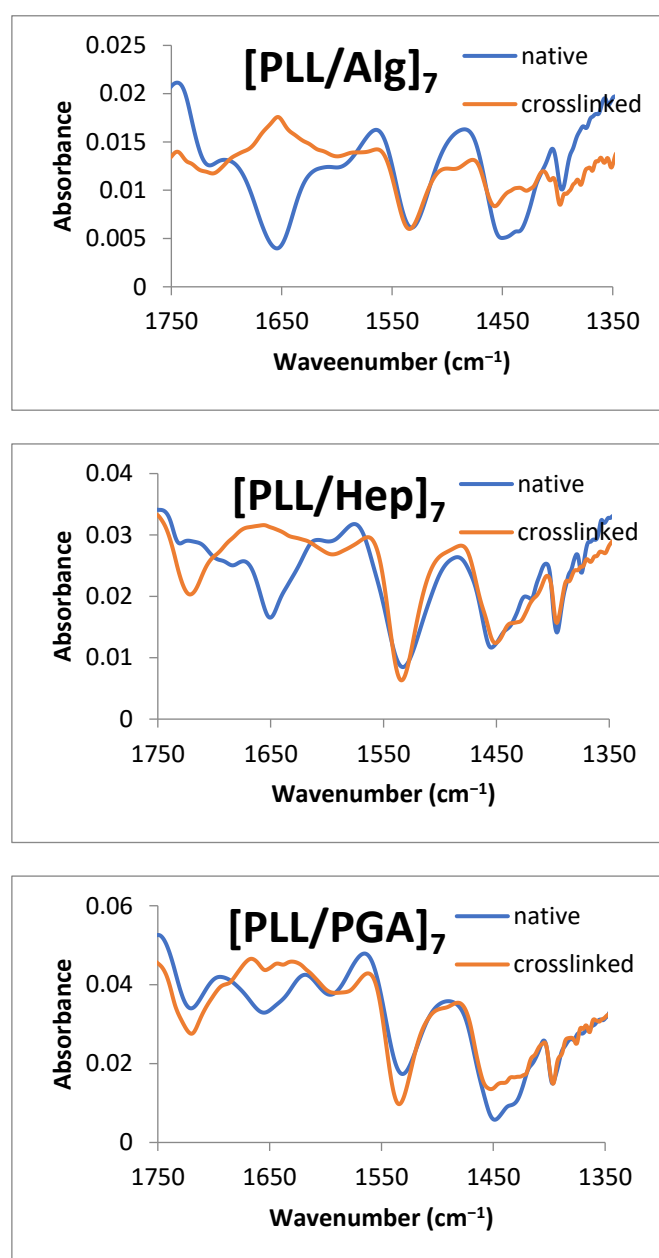

**Figure S1.** ATR FT-IR spectra of [PLL/Alg]<sub>7</sub>, [PLL/Hep]<sub>7</sub>, and [PLL/PGA]<sub>7</sub> before and after crosslinking of BP EMs. All PLL-based nanofilms showed increased absorbance at around 1650  $\text{cm}^{-1}$  (primary amide peak) after crosslinking of the nanofilms.

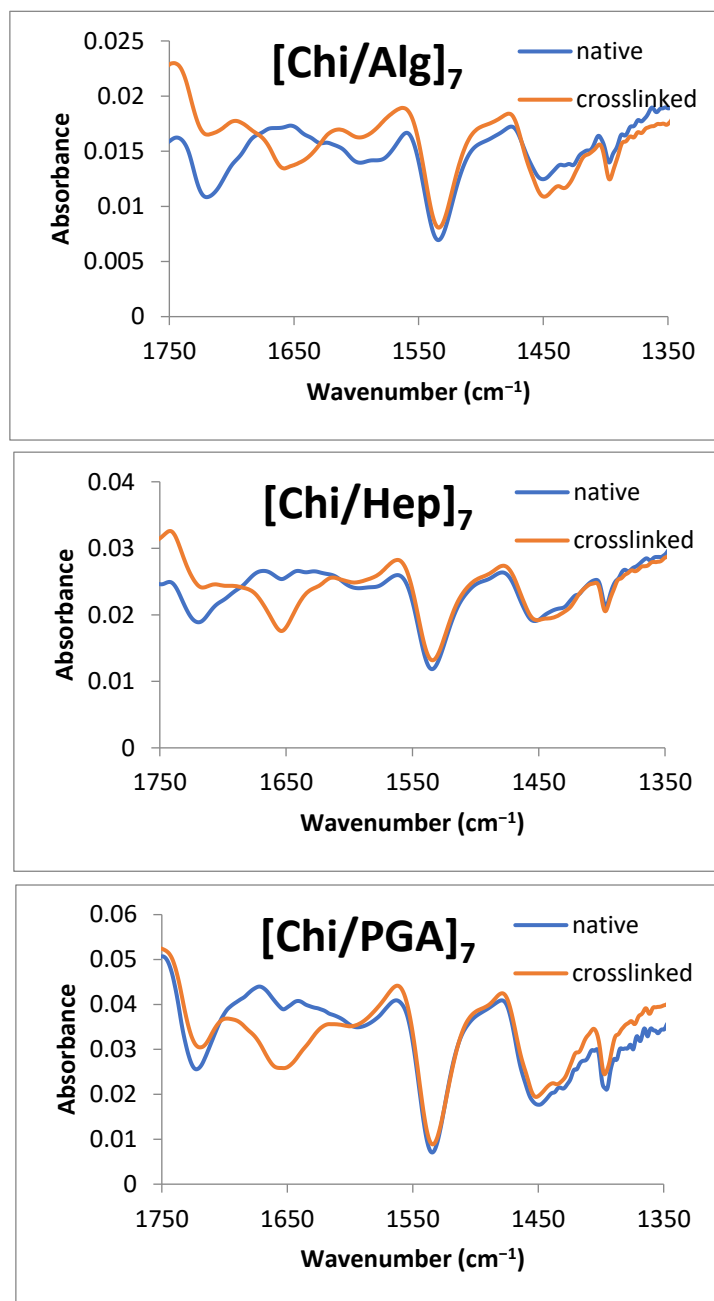

**Figure S2.** ATR FT-IR spectra of [Chi/Alg]<sub>7</sub>, [Chi/Hep]<sub>7</sub>, and [Chi/PGA]<sub>7</sub> before and after crosslinking of BPEMs. Chi-based BPEMs exhibited decreased absorbance at the same wavenumber, 1650 cm<sup>-1</sup>. In general, strong intramolecular hydrogen bonding with aldehydes, ketones, or esters appears at 1630–1670 cm<sup>-1</sup>.

We interpret our findings as showing that hydrogen bonding in Chi-based materials was displaced after crosslinking of BPEMs.

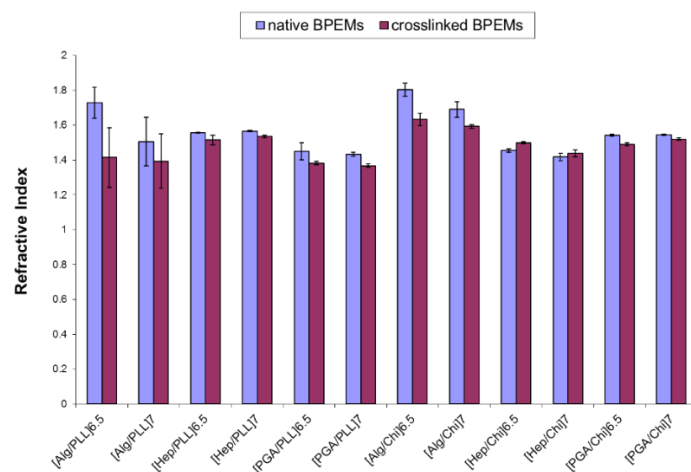

**Figure S3.** Refractive indices before and after crosslinking of BPEMs measured by ellipsometry. Error bars represent 95% confidence intervals (n = 15).

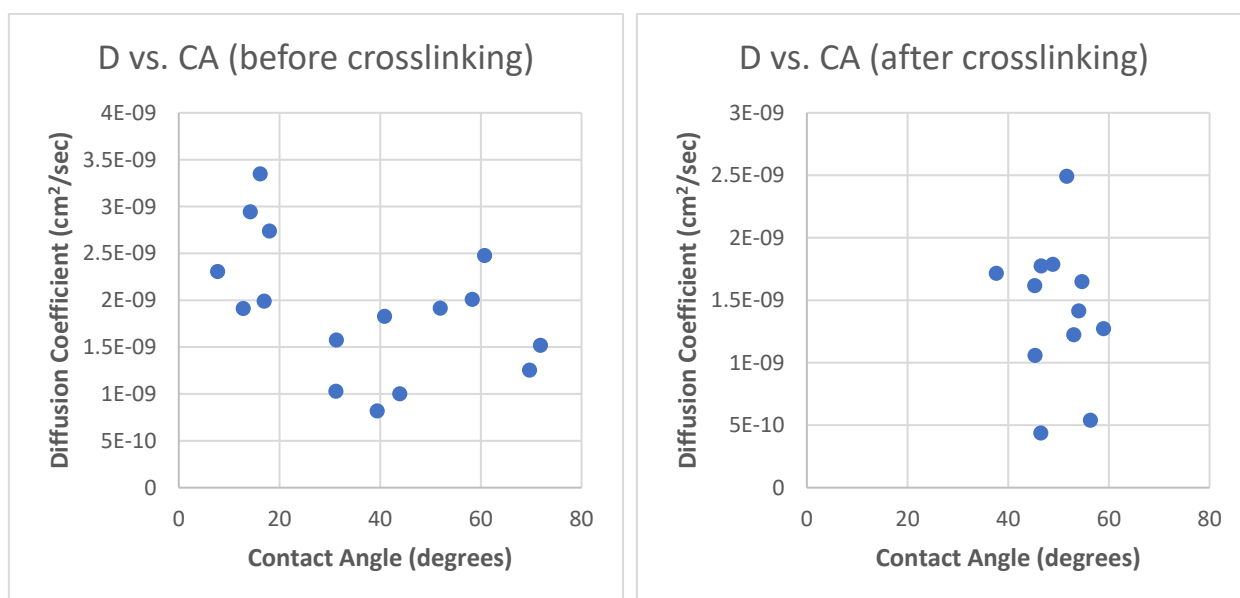

**Figure S4.** Scatter plots of diffusion coefficient versus contact angle, before and after crosslinking. From this, no obvious correlation between the two properties is observed.
